# Supplementary material
Source: ML conference proceedings conference paper supplement (https://openaccess.thecvf.com/content/CVPR_2020/html/Hou_Real-Time_Panoptic_Segmentation_CVPR_2020_paper.html)
Supplement: Supplementary file 1 [file Hou_Real-Time_Panoptic_Segmentation_CVPR_2020_supplemental.zip]

# Supplementary Material

Rui Hou<sup>\*,1,2</sup> Jie Li<sup>\*,1</sup> Arjun Bhargava<sup>1</sup> Allan Raventos<sup>1</sup> Vitor Guizilini<sup>1</sup> Chao Fang<sup>1</sup>  
Jerome Lynch<sup>2</sup> Adrien Gaidon<sup>1</sup>

<sup>1</sup>Toyota Research Institute <sup>2</sup>University of Michigan, Ann Arbor

<sup>1</sup>{firstname.lastname}@tri.global <sup>2</sup>{rayhou, jerlynch}@umich.edu

We provide more detailed descriptions, metrics, and visualizations for our proposed approach that were not included in the main text due to space limitation:

- per-class metrics of our model on Cityscapes and COCO (Tables 1 and 2 in the main text);
- implementation details for the comparison without levelness presented in the ablative analysis (Table 3 in the main text);
- detailed description and discussion of the proposed weakly supervised application of our method (Section 5.6 Table 3 in the main text);

## 1. Per-class Performance

We provide per-class PQ metrics of our models on Cityscapes and COCO dataset in Table S1 and Table S2, which corresponds respectively to the entries in Table 1 and Table 2 in the main text. For both datasets,  $\sigma = 0.3$  is used as the foreground mask acceptance probability in Eq. 8, which is determined through hyper-parameter grid search.

## 2. Contribution of Levelness Map

As we have shown in the paper (also depicted in Figure 3), our proposed model predicts a global levelness map using feature maps produced by the localization tower at all scale levels. This levelness map indicates which scale level does the bounding box at each location  $(x, y)$  belongs to (with 0 reserved for background). At inference time, the levelness map is used to provide indexes while we assemble the global dense bounding box prediction  $\mathcal{B}(x, y)$  from each FPN level  $(\{\mathbf{b}_{xy}^i\})$ , according to Eq. 15.

However, the levelness is not a necessity in our proposed model, as the assembling process can be done without it. In our ablative analysis in Section 5.5, we compared our method to a simple alternative assembling approach without levelness to justify the value of such design.

This alternative solution, instead of assembling a unique bounding box for each feature location  $(x, y)$ , carries all the bounding box predictions from different FPN levels  $i$  to the

foreground mask probability estimation:

$$\mathcal{B}(x, y; i) = \mathbf{b}_{xy}^i \quad (\text{S1})$$

Then the location based foreground probability becomes:

$$\hat{P}_{loc}(x, y, j; i) = \text{IoU}(\mathcal{B}(x, y; i), \mathbf{B}_j) \quad (\text{S2})$$

We can still obtain a single probability for each location by taking the maximum along the level dimension  $i$ :

$$\hat{P}_{loc}(x, y, j) = \underset{i}{\operatorname{argmax}}(\hat{P}_{loc}(x, y, j; i)) \quad (\text{S3})$$

We report the resulting model performance of this alternative solution in the second entry of the ablative analysis table (Table 3 in the main text). For simplicity, this comparison on levelness is done without the mask loss. All other configurations are the same as the default model. This comparison indicates that the levelness map, with only 1 additional convolutional layer, is able to provide a better cross-level indication that results in an increase in performance (+1% PQ).

## 3. Weakly Supervised Application

In the weakly supervised scenario discussed in Section 5.6 of the main text, we consider relying only on semantic and bounding box labels for the panoptic segmentation task.

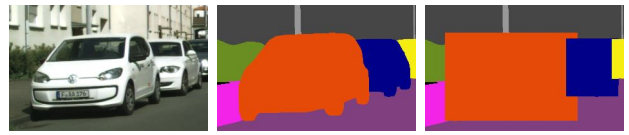

Figure S1: **Weak Supervision** Left: input image; Middle: fully supervised pixel association; Right: Weakly supervised pixel association. In this example, orange, blue and yellow color indicates the pixels which are assigned to a bounding box target of the three cars during training.

These two types of labels present a weaker supervision for the panoptic segmentation task, as there are ambiguous

| Class        | PQ    | SQ    | RQ    | Class         | PQ    | SQ    | RQ    |
|--------------|-------|-------|-------|---------------|-------|-------|-------|
| <b>Mean</b>  | 58.81 | 79.81 | 72.32 | road          | 97.58 | 97.88 | 99.69 |
| sidewalk     | 75.91 | 83.87 | 90.51 | building      | 87.67 | 89.49 | 97.96 |
| wall         | 30.02 | 72.21 | 41.57 | fence         | 34.89 | 73.27 | 47.62 |
| pole         | 50.15 | 65.23 | 76.88 | traffic light | 45.98 | 70.97 | 64.79 |
| traffic sign | 68.23 | 77.32 | 88.24 | vegetation    | 88.78 | 90.27 | 98.35 |
| terrain      | 34.45 | 73.75 | 46.72 | sky           | 86.73 | 92.16 | 94.10 |
| person       | 47.96 | 75.76 | 63.30 | rider         | 49.61 | 70.76 | 70.11 |
| car          | 60.55 | 83.30 | 72.69 | truck         | 47.16 | 83.12 | 56.74 |
| bus          | 68.51 | 88.75 | 77.19 | train         | 55.94 | 83.91 | 66.67 |
| motorcycle   | 44.54 | 72.68 | 61.28 | bicycle       | 42.86 | 71.76 | 59.72 |

Table S1: Per-class Performance on Cityscapes

pixels between overlapping bounding boxes of the same category.

In our proposed algorithm, we directly regress the bounding box and semantic classification. The construction of instance masks relies on the accuracy of the bounding box predictions instead of the explicit modeling of instance shapes. Thus, our method is robust to the absence of foreground mask information. In our implementation, we relax the pixel assignment during bounding box prediction as depicted in Figure S1, favoring the smallest bounding box in overlapping cases.

As shown in Table 3, our weakly supervised model achieved 55.7 PQ, i.e. 95% of the performance of the fully supervised model. Some qualitative examples are also provided in Figure S2.

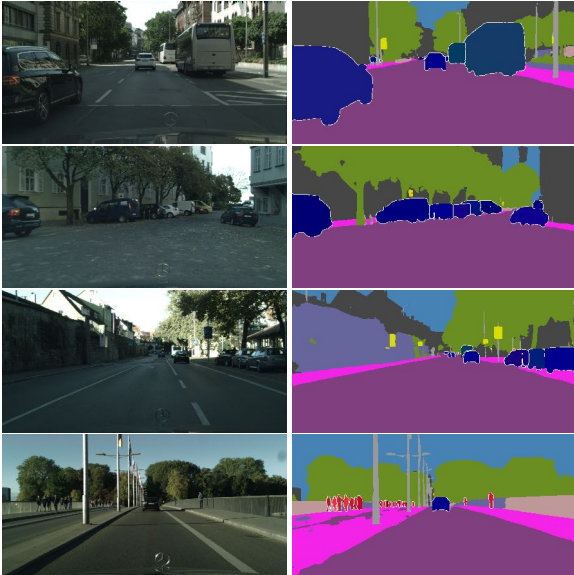

Figure S2: Weakly supervised panoptic segmentation. Our proposed algorithm obtains promising and practical prediction results, trained with only bounding box and semantic labels.

| Class          | PQ    | SQ    | RQ    | Class          | PQ    | SQ    | RQ    |
|----------------|-------|-------|-------|----------------|-------|-------|-------|
| <b>Mean</b>    | 37.13 | 76.14 | 46.98 | tv             | 61.49 | 84.71 | 72.59 |
| bed            | 52.43 | 83.47 | 62.82 | bus            | 66.56 | 86.39 | 77.05 |
| car            | 45.06 | 76.82 | 58.66 | cat            | 71.66 | 86.64 | 82.71 |
| cow            | 53.58 | 77.06 | 69.53 | cup            | 43.82 | 81.58 | 53.72 |
| dog            | 62.20 | 83.26 | 74.70 | net            | 40.53 | 77.81 | 52.08 |
| sea            | 72.62 | 89.61 | 81.03 | tie            | 23.70 | 69.93 | 33.89 |
| bear           | 73.45 | 85.47 | 85.94 | bird           | 34.53 | 75.04 | 46.01 |
| boat           | 28.71 | 69.99 | 41.02 | book           | 12.43 | 66.94 | 18.57 |
| bowl           | 39.12 | 79.67 | 49.10 | cake           | 41.43 | 80.86 | 51.23 |
| fork           | 13.32 | 67.63 | 19.70 | kite           | 33.84 | 71.18 | 47.54 |
| oven           | 47.03 | 80.87 | 58.15 | road           | 52.09 | 81.22 | 64.14 |
| roof           | 12.68 | 66.09 | 19.19 | sand           | 50.00 | 85.77 | 58.29 |
| sink           | 46.48 | 79.31 | 58.60 | skis           | 4.17  | 59.49 | 7.02  |
| snow           | 79.12 | 90.81 | 87.12 | tent           | 8.00  | 68.01 | 11.76 |
| vase           | 40.49 | 76.72 | 52.77 | apple          | 24.08 | 77.40 | 31.11 |
| bench          | 21.75 | 75.45 | 28.83 | chair          | 29.38 | 73.59 | 39.92 |
| clock          | 58.55 | 82.25 | 71.19 | couch          | 46.16 | 83.70 | 55.16 |
| donut          | 47.41 | 84.45 | 56.13 | fruit          | 4.42  | 56.74 | 7.79  |
| horse          | 55.45 | 77.40 | 71.64 | house          | 17.33 | 68.41 | 25.33 |
| knife          | 7.36  | 71.53 | 10.28 | light          | 15.48 | 67.57 | 22.91 |
| mouse          | 59.03 | 82.46 | 71.58 | pizza          | 55.86 | 84.97 | 65.74 |
| river          | 43.97 | 86.54 | 50.81 | sheep          | 48.27 | 76.27 | 63.29 |
| shelf          | 13.45 | 62.14 | 21.65 | spoon          | 3.95  | 70.62 | 5.59  |
| towel          | 21.27 | 75.28 | 28.25 | train          | 69.25 | 87.58 | 79.07 |
| truck          | 37.23 | 79.59 | 46.78 | zebra          | 62.10 | 79.77 | 77.85 |
| banana         | 23.25 | 74.59 | 31.17 | banner         | 12.18 | 72.80 | 16.72 |
| bottle         | 40.52 | 76.06 | 53.27 | bridge         | 12.35 | 62.64 | 19.72 |
| carrot         | 20.33 | 70.37 | 28.89 | flower         | 17.92 | 78.22 | 22.92 |
| gravel         | 13.75 | 70.55 | 19.49 | laptop         | 52.07 | 80.26 | 64.88 |
| orange         | 29.22 | 81.95 | 35.66 | person         | 55.63 | 76.64 | 72.58 |
| pillow         | 1.34  | 67.86 | 1.98  | remote         | 22.41 | 74.18 | 30.22 |
| stairs         | 12.77 | 68.65 | 18.60 | toilet         | 68.16 | 86.37 | 78.92 |
| bicycle        | 31.45 | 70.83 | 44.40 | blanket        | 4.92  | 66.76 | 7.37  |
| counter        | 18.58 | 69.66 | 26.67 | curtain        | 42.60 | 78.10 | 54.55 |
| frisbee        | 57.23 | 81.01 | 70.65 | giraffe        | 63.30 | 78.75 | 80.38 |
| handbag        | 15.24 | 72.38 | 21.05 | hot dog        | 32.36 | 82.80 | 39.08 |
| toaster        | 19.90 | 64.69 | 30.77 | airplane       | 60.55 | 80.01 | 75.68 |
| backpack       | 18.91 | 75.04 | 25.20 | broccoli       | 29.18 | 72.30 | 40.35 |
| elephant       | 65.76 | 80.56 | 81.62 | keyboard       | 49.18 | 80.80 | 60.87 |
| platform       | 19.08 | 79.62 | 23.96 | railroad       | 44.68 | 72.61 | 61.54 |
| sandwich       | 33.86 | 81.97 | 41.31 | scissors       | 31.51 | 75.92 | 41.51 |
| suitcase       | 42.38 | 78.90 | 53.71 | umbrella       | 51.68 | 79.63 | 64.90 |
| cardboard      | 16.68 | 68.63 | 24.31 | microwave      | 57.83 | 82.50 | 70.10 |
| snowboard      | 19.16 | 72.23 | 26.53 | stop sign      | 67.28 | 91.11 | 73.85 |
| surfboard      | 39.52 | 74.85 | 52.80 | wall-tile      | 44.76 | 77.36 | 57.86 |
| wall-wood      | 19.96 | 72.12 | 27.67 | cell phone     | 32.06 | 80.52 | 39.81 |
| door-stuff     | 20.98 | 72.71 | 28.85 | floor-wood     | 43.09 | 79.43 | 54.25 |
| hair drier     | 0.00  | 0.00  | 0.00  | motorcycle     | 47.36 | 76.38 | 62.01 |
| rug            | 37.32 | 78.32 | 47.65 | skateboard     | 44.63 | 71.17 | 62.71 |
| teddy bear     | 52.60 | 81.06 | 64.90 | toothbrush     | 10.08 | 69.57 | 14.49 |
| wall-brick     | 27.88 | 72.79 | 38.31 | wall-stone     | 17.45 | 76.97 | 22.67 |
| wine glass     | 35.82 | 76.88 | 46.59 | dirt           | 30.02 | 77.54 | 38.72 |
| rock           | 32.14 | 77.30 | 41.57 | sports ball    | 45.27 | 78.09 | 57.97 |
| tree           | 64.41 | 80.82 | 79.70 | water-other    | 22.09 | 81.91 | 26.97 |
| baseball bat   | 23.83 | 66.73 | 35.71 | dining table   | 29.18 | 74.86 | 38.98 |
| fence          | 26.39 | 71.53 | 36.89 | fire hydrant   | 65.68 | 83.51 | 78.65 |
| grass          | 54.96 | 82.77 | 66.40 | mirror-stuff   | 26.98 | 73.91 | 36.50 |
| paper          | 11.18 | 67.05 | 16.67 | playingfield   | 62.58 | 88.66 | 70.59 |
| potted plant   | 28.78 | 71.20 | 40.42 | refrigerator   | 57.87 | 85.28 | 67.86 |
| table          | 20.75 | 72.09 | 28.79 | window-blind   | 37.01 | 79.52 | 46.54 |
| window-other   | 27.50 | 72.53 | 37.92 | parking meter  | 54.27 | 81.41 | 66.67 |
| tennis racket  | 57.19 | 78.94 | 72.45 | traffic light  | 38.18 | 74.12 | 51.51 |
| baseball glove | 36.60 | 76.41 | 47.90 | cabinet        | 40.15 | 77.20 | 52.01 |
| ceiling        | 50.09 | 78.23 | 64.03 | mountain       | 41.87 | 75.86 | 55.20 |
| pavement       | 36.49 | 77.79 | 46.90 | sky-other      | 81.65 | 90.76 | 89.96 |
| food-other     | 13.83 | 72.99 | 18.95 | wall-other     | 44.06 | 77.33 | 56.97 |
| floor-other    | 38.16 | 78.39 | 48.68 | building-other | 38.17 | 77.90 | 49.00 |

Table S2: Per-class Performance on COCO
